# Supplementary material for: Automatic Localization of Seizure Onset Zone Based on Multi-Epileptogenic Biomarkers Analysis of Single-Contact from Interictal SEEG
Source: MDPI journal article supplement (doi:10.3390/bioengineering9120769), 2022-12-05
Supplement: s1 [file s1]

**Title:** Automatic Localization of Seizure Onset Zone Based on Multi-Epileptogenic Biomarkers Analysis of Single-Contact from Interictal SEEG

**Supplementary Materials**

**Table S1.** High-frequency band(80-250Hz) features.

| High DWT            |             |
|---------------------|-------------|
| Kraskov entropy     | Energy      |
| Renyi entropy       | SVD entropy |
| Permutation entropy | PFD         |
| Sample entropy      | KFD         |
| Shannon entropy     | HFD         |

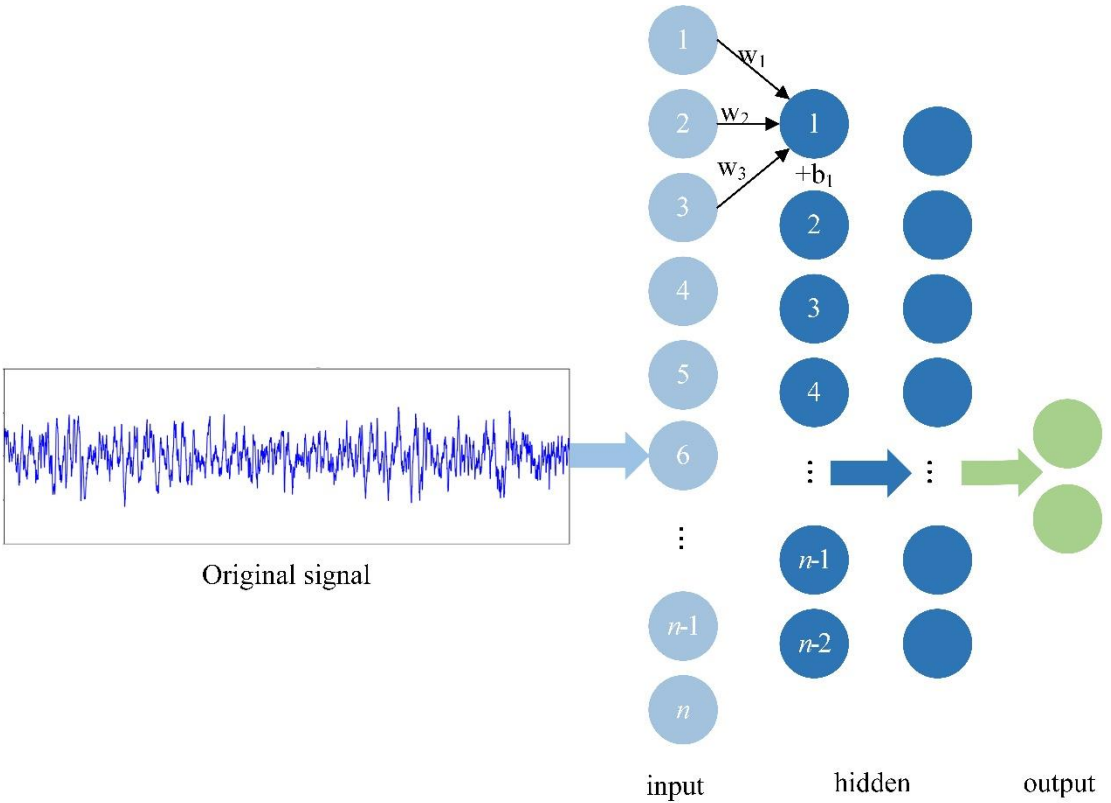

**Figure S1.** The structure of 1D-CNN.



---

|    |                     |                                                                                                                                                                    |
|----|---------------------|--------------------------------------------------------------------------------------------------------------------------------------------------------------------|
|    | domain              | $+ \cdots \frac{d}{N} \sum_{i=1}^N \log(2\delta(x_i, k)),$ $V_d = \pi^{d/2} / \Gamma(1 + d/2) / 2^d, k = 4$                                                        |
| 13 | Renyi entropy       | $RE_\alpha(X) = \frac{1}{1-\alpha} \log \left( \sum_{i=1}^N p_i^\alpha \right), \alpha = 2$                                                                        |
| 14 | Permutation entropy | $PE_D = -\frac{1}{\log_2 D!} \sum_{i=0}^{D!} p_i \log_2 p_i, D = 3$                                                                                                |
| 15 | Sample entropy      | $SaE = -\ln \left[ \frac{(N-k+1)^{-1} \sum_{i=1}^{N-k+1} A_i^k(r)}{(N-m+1)^{-1} \sum_{i=1}^{N-m+1} B_i^m(r)} \right],$ $m = 2, r = 0.2 \times  \sigma , k = m + 1$ |
| 16 | Shannon entropy     | $ShE(X) = \lim_{\alpha \rightarrow 1} RE_\alpha(X) = -\sum_{i=1}^N p_i \log p_i$                                                                                   |
| 17 | Energy              | $E = \sum_{i=1}^N x_i^2$                                                                                                                                           |
| 18 | SVD Entropy         | $Svd = -\frac{1}{\log(N)} \sum_{j=1}^N \left( \frac{s_j^2}{\sum_k s_k^2} \right) \log \left( \frac{s_j^2}{\sum_k s_k^2} \right)$                                   |
| 19 | PFD                 | $P_D = \frac{\log n}{\log n + \log \left( \frac{n}{n + 0.4N} \right)}$                                                                                             |
| 20 | KFD                 | $K_D = \frac{\log n}{\log \left( \frac{d}{L} \right) + \log n}$                                                                                                    |
| 21 | HFD                 | $H_D = \ln \left( \sum_{m=1}^k L_m(k) \right)$                                                                                                                     |

---
